# Supplementary material
Source: PubMed Central journal article supplement (PMC3398563)
Supplement: supp_tpc.112.096743_tpc096743Supplemental.pdf [file supp_tpc.112.096743_tpc096743Supplemental.pdf]

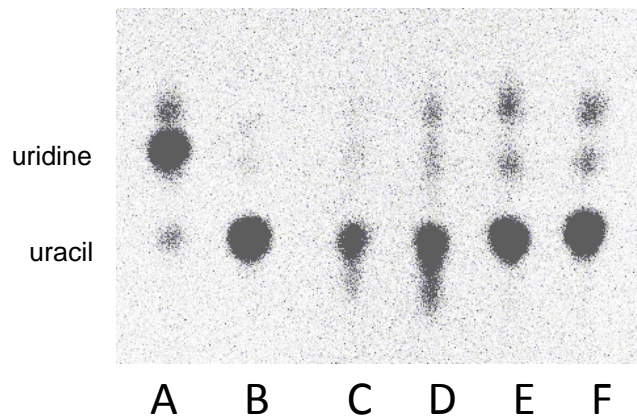

**Supplemental Figure 1. Thin layer chromatography (TLC) of reaction products after incubation of radiolabeled nucleosides with *PLUTO* expressing *E. coli* cells.**

Metabolites separated by TLC were visualized by autoradiography. **(A)** [ $^{14}\text{C}$ ]-uridine standard **(B)** [ $^{14}\text{C}$ ]-uracil standard **(C-F)**

supernatant and pellet fraction of *E. coli* cells incubated with [ $^{14}\text{C}$ ]-uridine [20  $\mu\text{M}$ ] for 10 min **(C)** pellet fraction of induced cells **(D)** pellet fraction of non-induced cells **(E)** supernatant of induced cells **(F)** supernatant of non-induced cells. ...

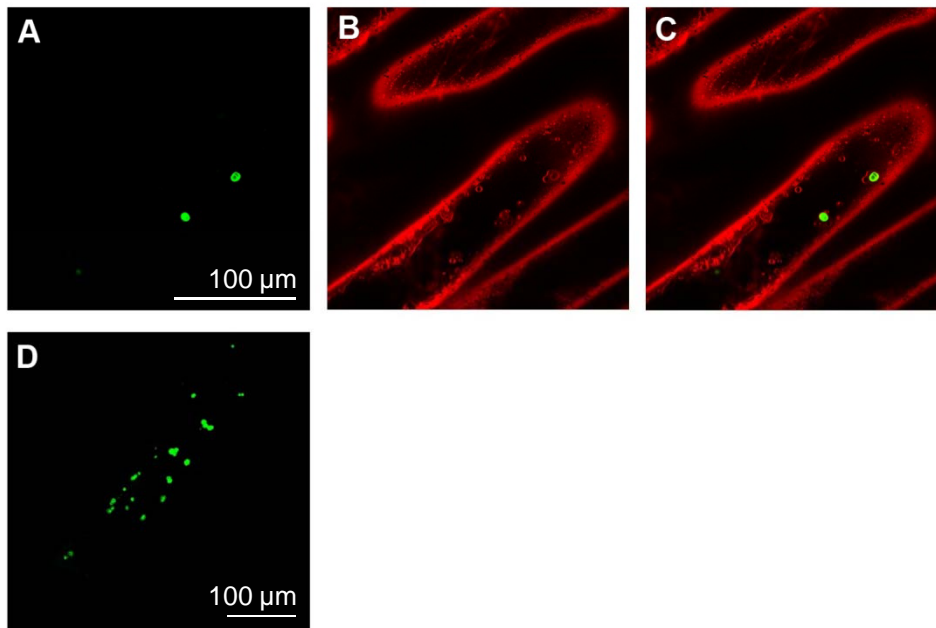

**Supplemental Figure 2. Transient expression of *PLUTO-GFP* in onion epidermal cells.**

**(A-C)** confocal slices of transformed onion epidermal cell **(A)** GFP fluorescence **(B)** fluorescence of FM 4-64 dye, labeling cell wall, plasma membrane and internal membranes **(C)** merge of A and B. **(D)** maximum projection of individual confocal slices showing GFP fluorescence of PLUTO in plastids.

Table S1 Primers used in this study

Quantitative RT-PCR Primers

|                      |                               |
|----------------------|-------------------------------|
| PLUTO-RT_fwd         | 5'-TTCTTGACCGCAGTTCTCGG-3'    |
| PLUTO-RT_rev         | 5'-CCTTCCCAGACGAGACATTATG-3'  |
| Ef1 $\alpha$ -RT_fwd | 5'-GAGACCAAGTACTACTGCAC-3'    |
| Ef1 $\alpha$ -RT_rev | 5'-GTTGGTCCCTTGTACCAGTCAAG-3' |

Primers for heterologous PLUTO expression in *Escherichia coli*

|                     |                                      |
|---------------------|--------------------------------------|
| PLUTO_pTACMAT2_fwd  | 5'-TTTCTCGAGTGGTCTCCAATTGCTTAAGC-3'  |
| PLUTO_pTACMAT2k_fwd | 5'-TTTCTCGAGTGACCGGCTCAGAAATTAATG-3' |
| PLUTO_pTACMAT2_rev  | 5'-TTTGGTACCAAAGCGGATGTGAAGAAG-3'    |

Primers for GFP constructs

|                       |                                            |
|-----------------------|--------------------------------------------|
| PLUTO_pGFP2_fwd       | 5'-TTTTCTAGAATGGTCTCCAATTGCTTAAGCC-3'      |
| PLUTO_short_pGFP2_fwd | 5'-TTTTCTAGAATGACCGGCTCAGAAATTAATGACC-3'   |
| PLUTO_pGFP2_rev       | 5'-TTTCTCGAGCAAAAGCGGATGTGAAGAAG-3'        |
| Pyd1_pGFP2_fwd        | 5'-TTTTCTAGAGCTTCCATGATGTTCCGCC-3'         |
| Pyd1_pGFP2_rev        | 5'-TTTCTCGAGGTTAGAAACCATACTCTCAGTCTCC-3'   |
| DHODH_fwd             | 5'-TTTTCTAGAATGGCCGGAAGGGCTGCGACG-3'       |
| DHODH_rev             | 5'-TTTCTCGAGTCTGTGATCAGCACCAATTGC-3'       |
| NSH1_pGFP2_fwd        | 5'-CTGAGAGTTTCTAGAGGTTTTAT-3'              |
| NSH1_pGFP2_rev        | 5'-AAACATCATCTCGAGTGGCTTCAT-3'             |
| ATCase_pGFP2_fwd      | 5'-TTTTCTAGAATGTCTATTGCATCATCACTTACTTCA-3' |
| ATCase_pGFP2_rev      | 5'-TTTCTCGAGTACCAACCGACAAGCAGTAGC-3'       |
| DHOase_pGFP2_fwd      | 5'-TTTTCTAGAATGATAAAGACTTTGGTCTC-3'        |
| DHOase_pGFP2_rev      | 5'-TTTCTCGAGTTTCAACGGTTGCCATTG-3'          |
| UMPSase_pGFP2_fwd     | 5'-TTTTCTAGAATGTCAGCCATGGAAGCACTGATTCTC-3' |
| UMPSase_pGFP2_rev     | 5'-TTTCTCGAGCTGAGAGCATTTCTCC-3'            |
| NTT1_pGFP2_fwd        | 5'-TTTTCTAGAATGGAAGCTGTGATTCAAACC-3'       |
| NTT1_pGFP2_rev        | 5'-TTTCTCGAGTTATAAGTTGGTGGGAGCAGA-3'       |
